# Supplementary material for: CHMP4C regulates lung squamous carcinogenesis and progression through cell cycle pathway
Source: PubMed Central journal article supplement — J Thorac Dis. 2021 Aug;13(8):4762–74. doi: 10.21037/jtd-21-583 (PMC8411186; doi:10.21037/jtd-21-583), 2021-08
Supplement: jtd-13-08-4762-supplementary.pdf [file jtd-13-08-4762-supplementary.pdf]

**Table S1** Correlations between CHMP4C and clinicopathological characteristics

| Characteristics | CHMP4C expression |                 | P value |
|-----------------|-------------------|-----------------|---------|
|                 | low, no. cases    | high, no. cases |         |
| Age (years)     |                   |                 |         |
| ≤70             | 119               | 121             | 0.864   |
| >70             | 74                | 71              |         |
| Gender          |                   |                 |         |
| Female          | 50                | 49              | 1       |
| Male            | 143               | 143             |         |
| Tumor stage     |                   |                 |         |
| I/II            | 166               | 146             | 0.018   |
| III/IV          | 27                | 46              |         |

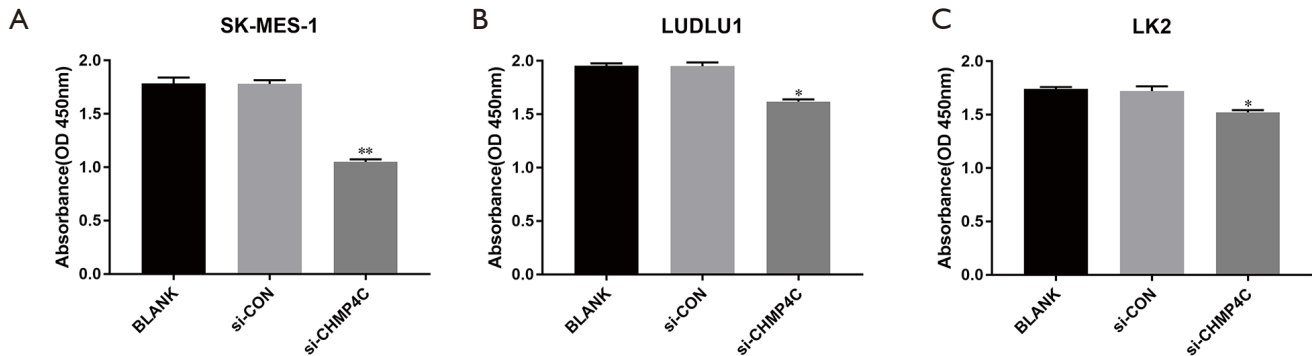

**Figure S1** Cell proliferation in LUSC cells measured using Cell Proliferation ELISA BrdU colorimetric assay. (a-c) Histograms of cell proliferation assays for SK-MES-1, LUDLU1 and LK3 cells transfected with si-NC, si-CHMP4C for 48h, respectively. Significant differences are indicated as follows: \* $P < 0.05$ , \*\* $P < 0.01$ , and \*\*\* $P < 0.001$ .

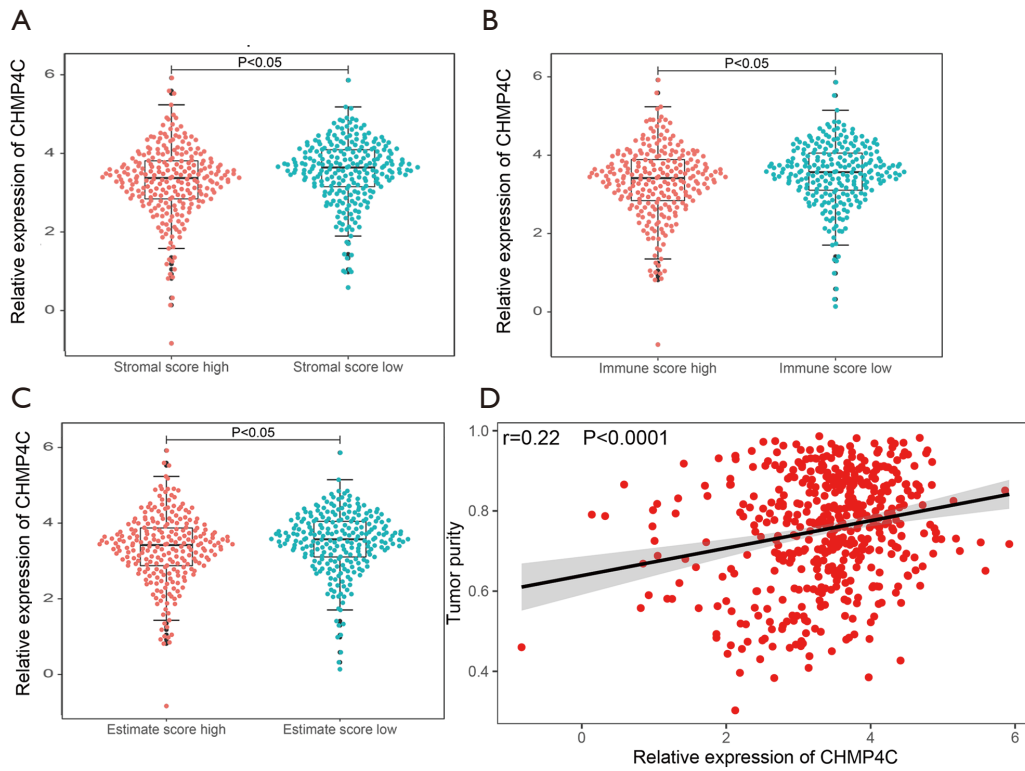

**Figure S2** CHMP4C expression is elevated in LUSC samples from TCGA database. (a-c) Analysis of CHMP4C mRNA levels (log<sub>2</sub>) in different stromal score, immune score and estimate score (low, high) of LUSC tissues from TCGA database ( $P<0.05$ ). (d) The positive correlation between CHMP4C mRNA expression level (log<sub>2</sub>) and tumor purity in TCGA database ( $R=0.22$ ,  $P<0.0001$ ).
